# Supplementary material
Source: PubMed Central journal article supplement (PMC4378879)
Supplement: Supp_Table1.pdf [file Supp_Table1.pdf]

## Supplementary Data

SUPPLEMENTARY TABLE S1. SEQUENCE OF THE PRIMERS USED IN THIS STUDY

| <i>Sl no.</i> | <i>Gene name</i> | <i>Accession no.</i> | <i>Size (bp)</i> | <i>AT (°C)</i> | <i>Primer sequences</i>                              |
|---------------|------------------|----------------------|------------------|----------------|------------------------------------------------------|
| 1             | <i>OCT-4</i>     | EU926737             | 232              | 58             | F, GATATACCCAGGCCGATGTG<br>R, TCGATACTCGTCCGTTTCT    |
| 2             | <i>CDX-2</i>     | NM_001206299.1       | 121              | 58             | F, GTCTGGAGCTGGAGAAGGAG<br>R, CTGCGGTTCTGAAACCAAAT   |
| 3             | <i>DNMT3a</i>    | NM_001206502.1       | 188              | 58             | F, GTGCTGTCTCTATTCGATGG<br>R, CCATTCTGGATATGCTTCTG   |
| 4             | <i>DNMT1</i>     | NM_182651.2          | 138              | 58             | F, CTCAGAAGGGAGATGTGGAG<br>R, TAGTAGTCACAGTAGCTGAGGA |
| 5             | <i>NANOG</i>     | DQ487022             | 211              | 57             | F, GGGGAAGGGTAATGAGTCCAA<br>R, AGCCTCCCTATCCCAGAAAA  |
| 6             | <i>SOX-2</i>     | DQ487021             | 162              | 60             | F, TCCACATTGAGATCAGCAA<br>R, CATGAGCGTCTTGGTTTTCC    |
| 7             | <i>CASPASE3</i>  | NM_001077840.1       | 158              | 58             | F, TGGTATTGAGACAGACAGTGG<br>R, AGCATCTCACAAGAAGCCTG  |
| 8             | <i>BCL-XL</i>    | AF245488.1           | 187              | 58             | F, CTTGGATGGCCACTTACCTG<br>R, AAGAGTGAGCCCAGCAGAAC   |
| 9             | <i>GATA2</i>     | XM_583307.3          | 140              | 58             | F, GAGGACTGTAAGCGTAAAGG<br>R, AAGAACCAAGTCTCCCAT     |
| 10            | <i>GAPDH</i>     | GU32429.1            | 235              | 58             | F, ATCACCTCGCTTCTACTGG<br>R, AGGAGACAACCTGGTCCTCA    |

AT, Annealing temperature; F, forward; R, reverse.
